# Supplementary material for: Error and Error Mitigation in Low-Coverage Genome Assemblies
Source: PubMed Central journal article supplement (PMC3038916; doi:10.1371/journal.pone.0017034), 2011-02-14
Supplement: pone.0017034.s007.pdf [file pone.0017034.s007.pdf]

# Error and Error Mitigation in Low-Coverage Genomes

M.J. Hubisz, M.F. Lin, M. Kellis, A. Siepel

Table S1: Species nomenclature

| Scientific name                         | Common name                          | ENCODE sequence name | 2x sequence name |
|-----------------------------------------|--------------------------------------|----------------------|------------------|
| <i>Dasybus novemcinctus</i>             | Nine-banded Armadillo                | armadillo            | dasNov2          |
| <i>Echinops telfairi</i>                | Lesser Hedgehog Tenrec               | tenrec               | echTel1          |
| <i>Erinaceus europaeus</i> <sup>a</sup> | European Hedgehog <sup>a</sup>       | hedgehog             | eriEur1          |
| <i>Felis catus</i>                      | Domestic Cat                         | cat                  | felCat3          |
| <i>Loxodonta africana</i>               | African Savannah Elephant            | elephant             | loxAfr2          |
| <i>Microcebus murinus</i>               | Gray Mouse Lemur                     | mouse_lemur          | micMur1          |
| <i>Myotis lucifugus</i>                 | Little Brown Bat <sup>b</sup>        | sbbat                | myoLuc1          |
| <i>Oryctolagus cuniculus</i>            | European Rabbit <sup>c</sup>         | rabbit               | oryCun1          |
| <i>Otolemur garnettii</i>               | Northern Greater Galago <sup>d</sup> | galago               | otoGar1          |
| <i>Procavia capensis</i>                | Rock Hyrax                           | rock_hyrax           | proCap1          |
| <i>Pteropus vampyrus</i>                | Malayan Flying Fox <sup>e</sup>      | flying_fox           | pteVam1          |
| <i>Sorex araneus</i>                    | Common Shrew <sup>f</sup>            | shrew                | sorAra1          |
| <i>Spermophilus tridecemlineatus</i>    | 13-Lined Ground Squirrel             | st_squirrel          | speTri1          |
| <i>Tupaia belangeri</i>                 | Northern Tree Shrew                  | tree_shrew           | tupBel1          |
| <i>Cavia porcellus</i>                  | Guinea Pig                           | guinea_pig           | cavPor3          |

<sup>a</sup>The Middle-African Hedgehog, *Atelerix albiventris*, was sequenced by ENCODE, whereas the European hedgehog *Erinaceus europaeus* was sequenced for the 2x project

<sup>b</sup>Also called Microbat

<sup>c</sup>The breed of the ENCODE rabbit is New Zealand White

<sup>d</sup>Also called Bushbaby

<sup>e</sup>Also called Megabat

<sup>f</sup>Listed as European Shrew by ENCODE project, and Common Shrew by the 2x project
