# Supplementary material for: Error and Error Mitigation in Low-Coverage Genome Assemblies
Source: PubMed Central journal article supplement (PMC3038916; doi:10.1371/journal.pone.0017034), 2011-02-14
Supplement: pone.0017034.s008.pdf [file pone.0017034.s008.pdf]

# Error and Error Mitigation in Low-Coverage Genomes

M.J. Hubisz, M.F. Lin, M. Kellis, A. Siepel

Table S2: Summary of alignments of 2x genomes and corresponding ENCODE sequences

| 2x<br>assembly             | ENCODE<br>species | ENCODE<br>regions | Alignment<br>length (Mb) | Percent<br>coverage <sup>a</sup> |
|----------------------------|-------------------|-------------------|--------------------------|----------------------------------|
| dasNov2                    | armadillo         | 44                | 13.79                    | 38.3                             |
| echTel1                    | tenrec            | 42                | 11.15                    | 37.7                             |
| eriEur1                    | hedgehog          | 39                | 10.97                    | 39.1                             |
| felCat3                    | cat               | 43                | 12.69                    | 46.5                             |
| loxAfr2                    | elephant          | 44                | 16.90                    | 48.8                             |
| micMur1                    | mouse_lemur       | 43                | 19.18                    | 64.4                             |
| myoLuc1                    | sbbat             | 41                | 13.99                    | 59.7                             |
| oryCun1                    | rabbit            | 43                | 16.46                    | 53.3                             |
| otoGar1                    | galago            | 44                | 20.05                    | 53.7                             |
| proCap1                    | rock_hyrax        | 6                 | 3.79                     | 55.6                             |
| pteVam1                    | flying_fox        | 5                 | 4.30                     | 83.9                             |
| sorAra1                    | shrew             | 41                | 13.90                    | 57.0                             |
| speTri1                    | st_squirrel       | 44                | 14.42                    | 53.5                             |
| tupBel1                    | tree_shrew        | 4                 | 2.14                     | 53.5                             |
| <i>cavPor3<sup>b</sup></i> | <i>guinea_pig</i> | <i>41</i>         | <i>25.05</i>             | <i>95.9</i>                      |

<sup>a</sup>Fraction of ENCODE bases aligned to 2x assembly

<sup>b</sup>Sequenced to ~7x coverage and shown for comparison.

**Table S1.** Estimates of  $d_N/d_S$  for chr22 genes and four primates

| <b>branch</b>          | <b>full data</b> | <b>high-quality only</b> | <b>SEM</b> |
|------------------------|------------------|--------------------------|------------|
| tarsier                | 0.179            | 0.164                    | 0.165      |
| mouse lemur            | 0.173            | 0.166                    | 0.162      |
| bushbaby               | 0.189            | 0.179                    | 0.171      |
| tree shrew             | 0.135            | 0.123                    | 0.124      |
| <i>internal branch</i> | 0.161            | 0.142                    | 0.156      |

**Table S2.** CONGO performance with and without SEM

| <b>Gene Set</b>      | <b>Statistic<sup>a</sup></b> | <b>Baseline (%)<sup>b</sup></b> | <b>B+SEM (%)<sup>c</sup></b> | <b>SEM (%)<sup>d</sup></b> |
|----------------------|------------------------------|---------------------------------|------------------------------|----------------------------|
| CCDS <sup>e</sup>    | Exon Sn                      | 82.84                           | 82.88                        | 82.96                      |
|                      | Exon Sp                      | 76.86                           | 77.18                        | 77.38                      |
|                      | Missed Exons                 | 12.66                           | 12.71                        | 12.99                      |
|                      | Wrong Exons                  | 17.01                           | 16.95                        | 16.86                      |
|                      | Nuc Sn                       | 84.81                           | 85.10                        | 85.21                      |
|                      | Nuc Sp                       | 82.13                           | 82.08                        | 82.02                      |
| R+E+U+G <sup>f</sup> | Exon Sn                      | 74.26                           | 74.31                        | 74.36                      |
|                      | Exon Sp                      | 89.88                           | 90.28                        | 90.49                      |
|                      | Missed Exons                 | 21.86                           | 21.90                        | 22.17                      |
|                      | Wrong Exons                  | 3.01                            | 2.94                         | 2.88                       |
|                      | Nuc Sn                       | 76.01                           | 76.30                        | 76.40                      |
|                      | Nuc Sp                       | 96.89                           | 96.88                        | 96.80                      |

<sup>a</sup>As defined by [?]. Performance is measured against the whole genome, excluding the ENCODE “random” regions (~0.5% of the genome), which were used for training.

<sup>b</sup>Training and testing on original alignments.

<sup>c</sup>Training on original alignments, testing on alignments processed by SEM.

<sup>d</sup>Training and testing on alignments processed by SEM.

<sup>e</sup>“Consensus CDS” gene set (more conservative).

<sup>f</sup>Union of RefSeq, ENSEMBL, UCSC, and GENCODE gene sets (less conservative).

**Table S3.** CONGO performance by chromosome

| Chrom. | Exon Sp (%) <sup>a</sup> |                  | Exon Sn (%) <sup>b</sup> |                  |
|--------|--------------------------|------------------|--------------------------|------------------|
|        | Baseline                 | SEM <sup>c</sup> | Baseline                 | SEM <sup>c</sup> |
| 1      | 90.10                    | <b>90.67</b>     | 83.00                    | <b>83.11</b>     |
| 2      | 90.34                    | <b>90.75</b>     | 85.52                    | 85.43            |
| 3      | 90.43                    | <b>90.81</b>     | 86.27                    | 86.05            |
| 4      | 89.43                    | <b>89.79</b>     | 84.75                    | <b>84.76</b>     |
| 5      | 89.33                    | <b>89.54</b>     | 85.75                    | 85.69            |
| 6      | 89.16                    | <b>90.21</b>     | 84.05                    | <b>84.48</b>     |
| 7      | 90.61                    | <b>91.42</b>     | 81.99                    | <b>82.31</b>     |
| 8      | 89.53                    | <b>90.07</b>     | 85.05                    | <b>85.18</b>     |
| 9      | 89.97                    | <b>90.72</b>     | 84.53                    | <b>84.61</b>     |
| 10     | 90.02                    | <b>90.43</b>     | 83.94                    | 83.66            |
| 11     | 86.51                    | <b>87.35</b>     | 84.52                    | <b>84.86</b>     |
| 12     | 91.11                    | <b>91.64</b>     | 85.83                    | 85.83            |
| 13     | 90.62                    | <b>90.97</b>     | 81.85                    | <b>82.05</b>     |
| 14     | 88.55                    | <b>89.43</b>     | 86.19                    | <b>86.38</b>     |
| 15     | 91.28                    | <b>91.98</b>     | 83.00                    | <b>83.07</b>     |
| 16     | 89.99                    | <b>90.61</b>     | 79.69                    | <b>79.86</b>     |
| 17     | 90.93                    | <b>91.65</b>     | 83.53                    | <b>83.83</b>     |
| 18     | 89.24                    | <b>89.85</b>     | 88.07                    | <b>88.40</b>     |
| 19     | 89.93                    | <b>90.45</b>     | 71.70                    | <b>71.83</b>     |
| 20     | 91.38                    | <b>92.13</b>     | 85.24                    | <b>85.70</b>     |
| 21     | 91.36                    | <b>92.09</b>     | 81.76                    | <b>82.04</b>     |
| 22     | 90.83                    | <b>91.53</b>     | 80.33                    | <b>80.59</b>     |
| X      | 88.06                    | <b>88.88</b>     | 74.80                    | <b>75.04</b>     |
| Y      | 68.42                    | 68.42            | 5.13                     | 5.13             |

<sup>a</sup>Computed from union of RefSeq, ENSEMBL, UCSC, and GENCODE gene sets (R+E+U+G).

<sup>b</sup>Computed from CCDS gene set.

<sup>c</sup>SEM was used for training and testing. Bold indicates an improvement.
