# Supplementary material for: Error and Error Mitigation in Low-Coverage Genome Assemblies
Source: PubMed Central journal article supplement (PMC3038916; doi:10.1371/journal.pone.0017034), 2011-02-14
Supplement: pone.0017034.s009.pdf [file pone.0017034.s009.pdf]

# Error and Error Mitigation in Low-Coverage Genomes

M.J. Hubisz, M.F. Lin, M. Kellis, A. Siepel

Table S3: Estimates of  $d_N/d_S$  for chr22 genes and four primates

| <b>branch</b>          | <b>full data</b> | <b>high-quality only</b> | <b>SEM</b> |
|------------------------|------------------|--------------------------|------------|
| tarsier                | 0.179            | 0.164                    | 0.165      |
| mouse lemur            | 0.173            | 0.166                    | 0.162      |
| bushbaby               | 0.189            | 0.179                    | 0.171      |
| tree shrew             | 0.135            | 0.123                    | 0.124      |
| <i>internal branch</i> | 0.161            | 0.142                    | 0.156      |
