# Supplementary material for: Error and Error Mitigation in Low-Coverage Genome Assemblies
Source: PubMed Central journal article supplement (PMC3038916; doi:10.1371/journal.pone.0017034), 2011-02-14
Supplement: pone.0017034.s011.pdf [file pone.0017034.s011.pdf]

# Error and Error Mitigation in Low-Coverage Genomes

M.J. Hubisz, M.F. Lin, M. Kellis, A. Siepel

Table S5: CONGO performance by chromosome

| Chrom. | Exon Sp (%) <sup>a</sup> |                  | Exon Sn (%) <sup>b</sup> |                  |
|--------|--------------------------|------------------|--------------------------|------------------|
|        | Baseline                 | SEM <sup>c</sup> | Baseline                 | SEM <sup>c</sup> |
| 1      | 90.10                    | <b>90.67</b>     | 83.00                    | <b>83.11</b>     |
| 2      | 90.34                    | <b>90.75</b>     | 85.52                    | 85.43            |
| 3      | 90.43                    | <b>90.81</b>     | 86.27                    | 86.05            |
| 4      | 89.43                    | <b>89.79</b>     | 84.75                    | <b>84.76</b>     |
| 5      | 89.33                    | <b>89.54</b>     | 85.75                    | 85.69            |
| 6      | 89.16                    | <b>90.21</b>     | 84.05                    | <b>84.48</b>     |
| 7      | 90.61                    | <b>91.42</b>     | 81.99                    | <b>82.31</b>     |
| 8      | 89.53                    | <b>90.07</b>     | 85.05                    | <b>85.18</b>     |
| 9      | 89.97                    | <b>90.72</b>     | 84.53                    | <b>84.61</b>     |
| 10     | 90.02                    | <b>90.43</b>     | 83.94                    | 83.66            |
| 11     | 86.51                    | <b>87.35</b>     | 84.52                    | <b>84.86</b>     |
| 12     | 91.11                    | <b>91.64</b>     | 85.83                    | 85.83            |
| 13     | 90.62                    | <b>90.97</b>     | 81.85                    | <b>82.05</b>     |
| 14     | 88.55                    | <b>89.43</b>     | 86.19                    | <b>86.38</b>     |
| 15     | 91.28                    | <b>91.98</b>     | 83.00                    | <b>83.07</b>     |
| 16     | 89.99                    | <b>90.61</b>     | 79.69                    | <b>79.86</b>     |
| 17     | 90.93                    | <b>91.65</b>     | 83.53                    | <b>83.83</b>     |
| 18     | 89.24                    | <b>89.85</b>     | 88.07                    | <b>88.40</b>     |
| 19     | 89.93                    | <b>90.45</b>     | 71.70                    | <b>71.83</b>     |
| 20     | 91.38                    | <b>92.13</b>     | 85.24                    | <b>85.70</b>     |
| 21     | 91.36                    | <b>92.09</b>     | 81.76                    | <b>82.04</b>     |
| 22     | 90.83                    | <b>91.53</b>     | 80.33                    | <b>80.59</b>     |
| X      | 88.06                    | <b>88.88</b>     | 74.80                    | <b>75.04</b>     |
| Y      | 68.42                    | 68.42            | 5.13                     | 5.13             |

<sup>a</sup>Computed from union of RefSeq, ENSEMBL, UCSC, and GENCODE gene sets (R+E+U+G).

<sup>b</sup>Computed from CCDS gene set.

<sup>c</sup>SEM was used for training and testing. Bold indicates an improvement.
