# Supplementary material for: Error and Error Mitigation in Low-Coverage Genome Assemblies
Source: PLoS One. 2011 Feb 14;6(2):e17034. doi: 10.1371/journal.pone.0017034 (PMC3038916; doi:10.1371/journal.pone.0017034)
Supplement: Table S4 — CONGO performance with and without SEM. (PDF) [file pone.0017034.s010.pdf]

# Error and Error Mitigation in Low-Coverage Genomes

M.J. Hubisz, M.F. Lin, M. Kellis, A. Siepel

Table S4: CONGO performance with and without SEM

| Gene Set             | Statistic <sup>a</sup> | Baseline (%) <sup>b</sup> | B+SEM (%) <sup>c</sup> | SEM (%) <sup>d</sup> |
|----------------------|------------------------|---------------------------|------------------------|----------------------|
| CCDS <sup>e</sup>    | Exon Sn                | 82.84                     | 82.88                  | 82.96                |
|                      | Exon Sp                | 76.86                     | 77.18                  | 77.38                |
|                      | Missed Exons           | 12.66                     | 12.71                  | 12.99                |
|                      | Wrong Exons            | 17.01                     | 16.95                  | 16.86                |
|                      | Nuc Sn                 | 84.81                     | 85.10                  | 85.21                |
|                      | Nuc Sp                 | 82.13                     | 82.08                  | 82.02                |
| R+E+U+G <sup>f</sup> | Exon Sn                | 74.26                     | 74.31                  | 74.36                |
|                      | Exon Sp                | 89.88                     | 90.28                  | 90.49                |
|                      | Missed Exons           | 21.86                     | 21.90                  | 22.17                |
|                      | Wrong Exons            | 3.01                      | 2.94                   | 2.88                 |
|                      | Nuc Sn                 | 76.01                     | 76.30                  | 76.40                |
|                      | Nuc Sp                 | 96.89                     | 96.88                  | 96.80                |

<sup>a</sup>As defined by [1]. Performance is measured against the whole genome, excluding the ENCODE “random” regions (~0.5% of the genome), which were used for training.

<sup>b</sup>Training and testing on original alignments.

<sup>c</sup>Training on original alignments, testing on alignments processed by SEM.

<sup>d</sup>Training and testing on alignments processed by SEM.

<sup>e</sup>“Consensus CDS” gene set (more conservative).

<sup>f</sup>Union of RefSeq, ENSEMBL, UCSC, and GENCODE gene sets (less conservative).

## References

1. Burset M, Guigó R (1996) Evaluation of gene structure prediction programs. *Genomics* 34: 353-367.
